# Supplementary material
Source: PubMed Central journal article supplement (PMC3992119)

**Supplementary Figure S2. Effects of AT13387 and imatinib on pharmacodynamic markers of GIST-PSW tumors on Day 22.**

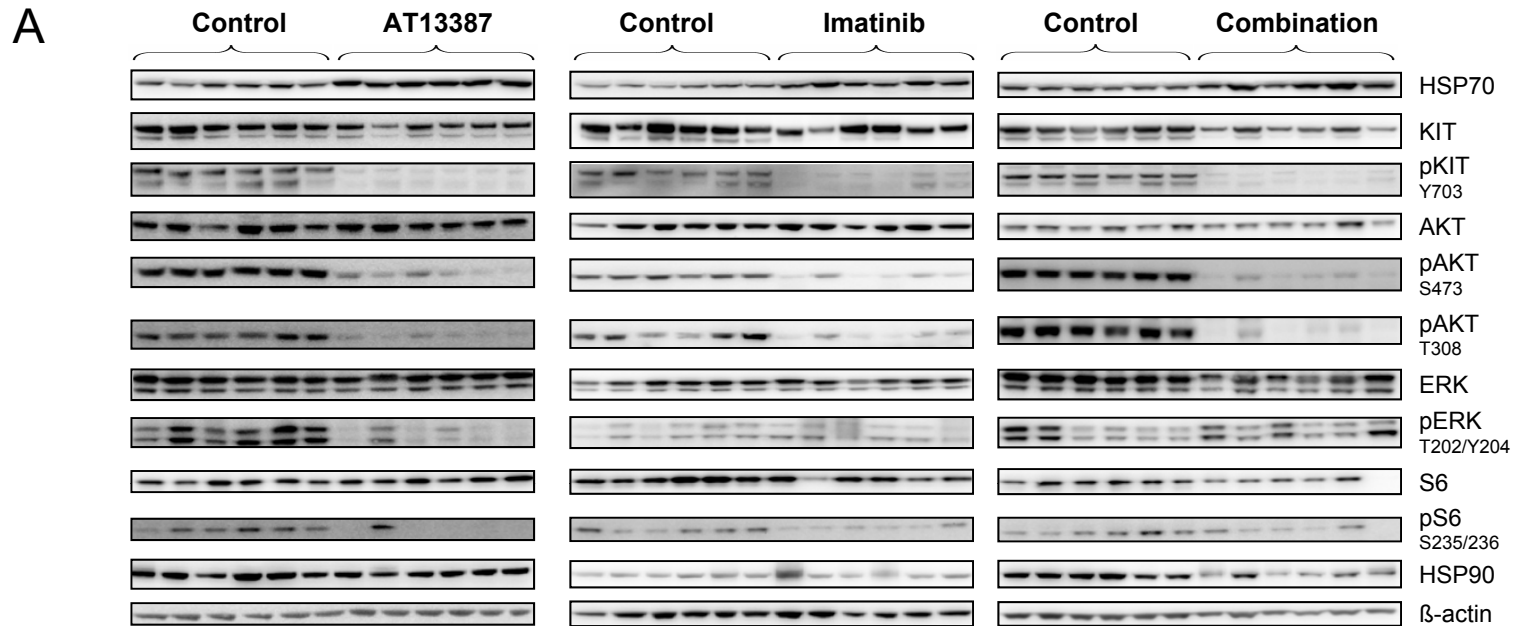

**B**

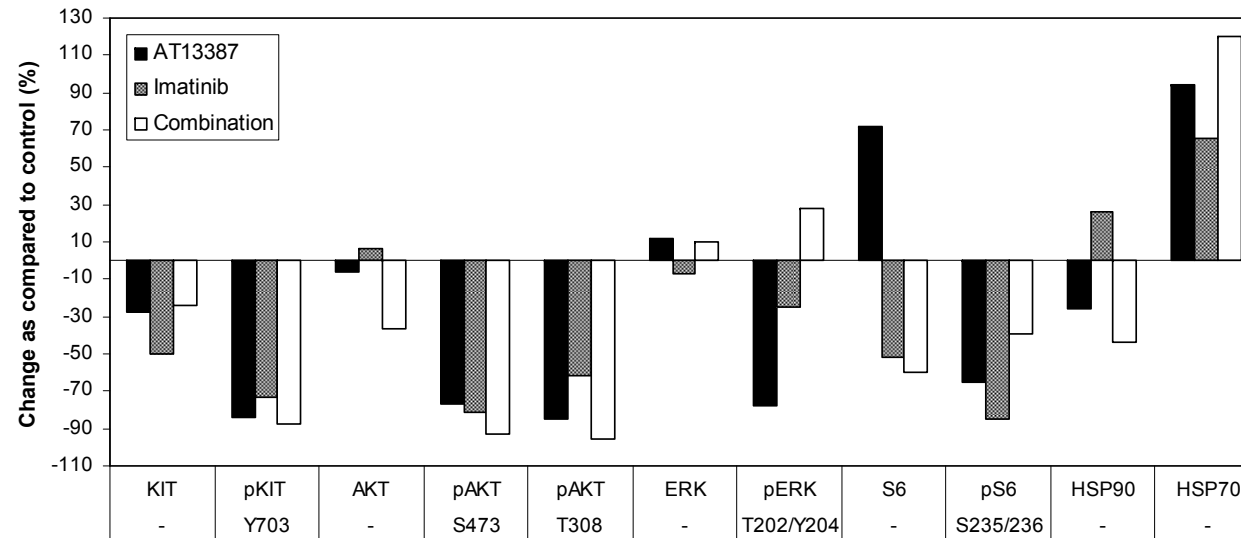

Supplement: NIHMS514087-supplement-SFig_2.pdf [file NIHMS514087-supplement-SFig_2.pdf]
