# Supplementary material
Source: PubMed Central journal article supplement (PMC3992119)

Supplementary Figure S1. Effects of AT13387 and imatinib on viability of GIST882, GIST430 and GIST48 cell lines.

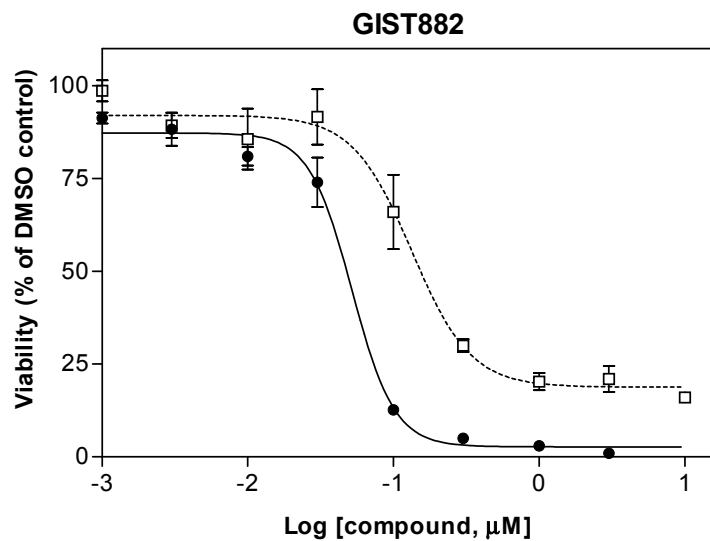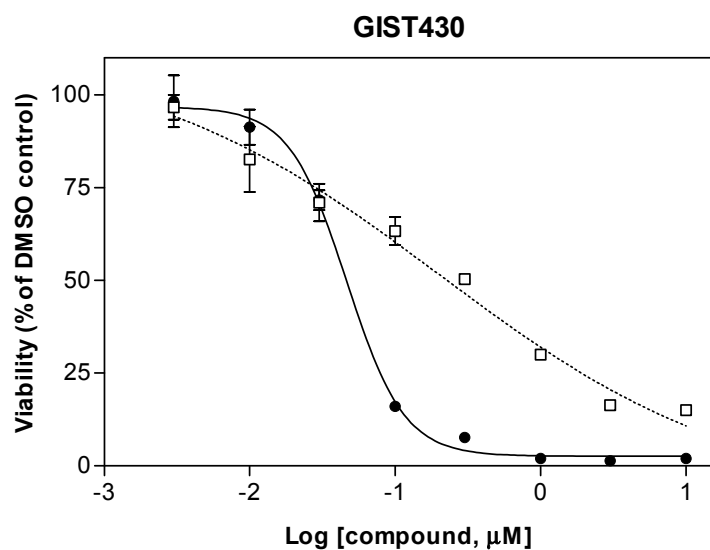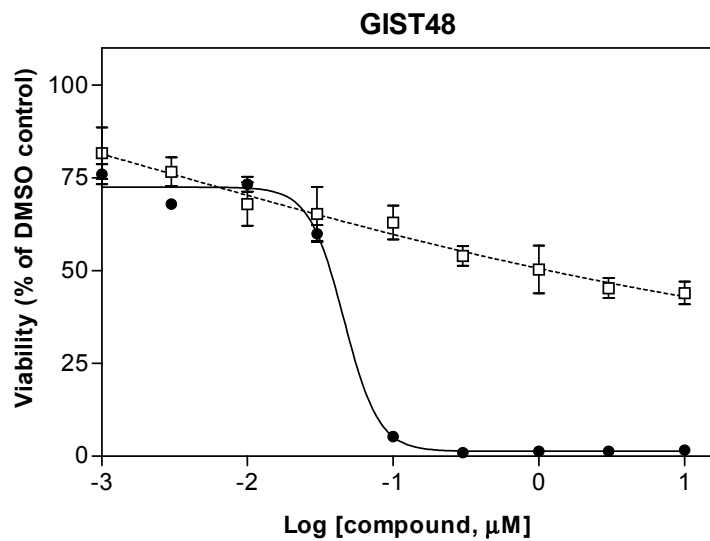

Supplement: NIHMS514087-supplement-SFIg_1.pdf [file NIHMS514087-supplement-SFIg_1.pdf]
